# Supplementary material for: Concentric dual π aromaticity in bowl-like B30cluster: an all-boron analogue of corannulene
Source: Royal Society of Chemistry journal article supplement (doi:10.1039/c6cp04464f), 2016-01-01

## SUPPLEMENTARY INFORMATION

### Concentric dual $\pi$ aromaticity in bowl-like $B_{30}$ cluster: an all-boron analogue of corannulene<sup>†</sup>

Kang Wang,<sup>a</sup> Da-Zhi Li,<sup>\*b</sup> Rui Li,<sup>a</sup> Lin-Yan Feng,<sup>a</sup> Ying-Jin Wang<sup>a</sup> and Hua-Jin Zhai<sup>\*ac</sup>

<sup>a</sup> *Nanocluster Laboratory, Institute of Molecular Science, Shanxi University,  
Taiyuan 030006, China. E-mail: hj.zhai@sxu.edu.cn*

<sup>b</sup> *Department of Chemical Engineering, Binzhou University,  
Binzhou 256603, China. E-mail: ldz005@126.com*

<sup>c</sup> *State Key Laboratory of Quantum Optics and Quantum Optics Devices,  
Shanxi University, Taiyuan 030006, China*

- Figure S1.** Comparison of  $\pi$  canonical molecular orbitals (CMOs) of (a) the  $C_{5v}$  (**1**,  $^1A_1$ ) global minimum of  $B_{30}$  and (b)  $C_{5v}$  (**2**,  $^1A_1$ ) of  $C_{20}H_{10}$ .
- Figure S2.** Natural charge distributions of (a)  $C_{5v}$  (**1**,  $^1A_1$ ) of  $B_{30}$  and (b)  $C_{5v}$  (**2**,  $^1A_1$ ) of  $C_{20}H_{10}$ .
- Figure S3.** Comparison of  $\pi$  canonical molecular orbitals of two local-minimum structures of  $B_{30}$ : (a) isomer  $C_1$ . (b) isomer  $C_s$ .

**Figure S1.** Comparison of  $\pi$  canonical molecular orbitals (CMOs) of (a) the  $C_{5v}$  (**1**,  $^1A_1$ ) global minimum of  $B_{30}$  and (b)  $C_{5v}$  (**2**,  $^1A_1$ ) of  $C_{20}H_{10}$ .

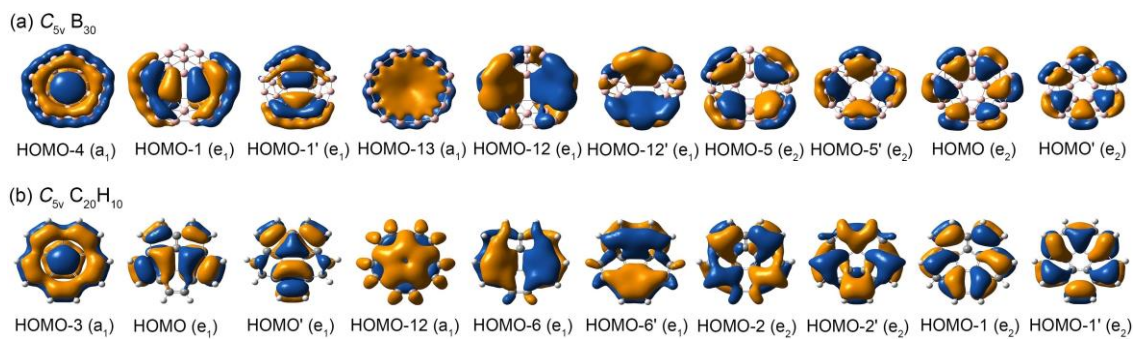

**Figure S2.** Natural charge distributions of (a)  $C_{5v}$  (**1**,  $^1A_1$ ) of  $B_{30}$  and (b)  $C_{5v}$  (**2**,  $^1A_1$ ) of  $C_{20}H_{10}$ .

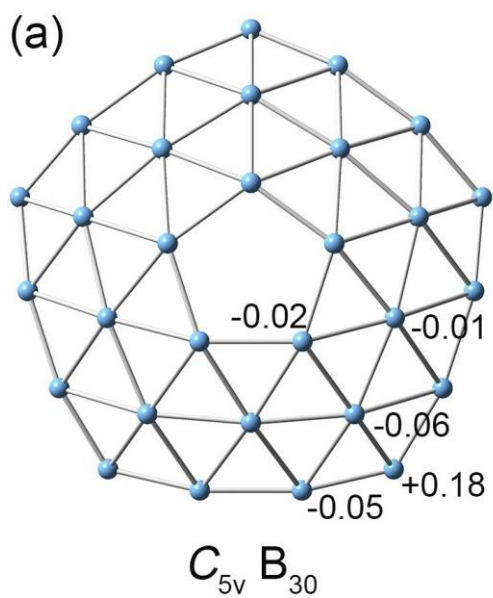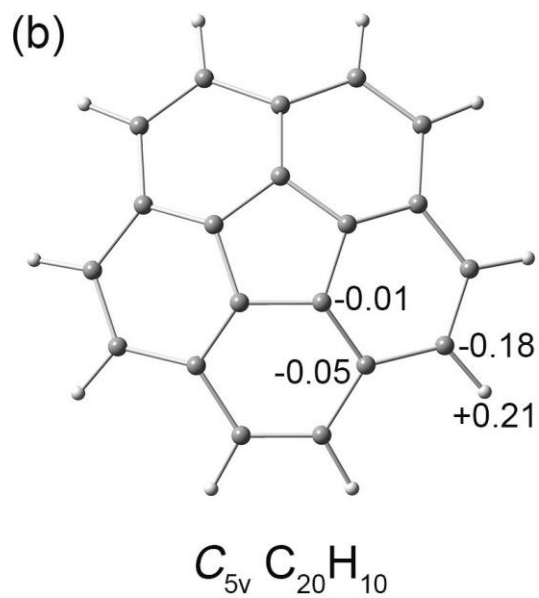

**Figure S3.** Comparison of  $\pi$  canonical molecular orbitals of two local-minimum structures of  $B_{30}$ : (a) isomer  $C_1$ . (b) isomer  $C_s$ .

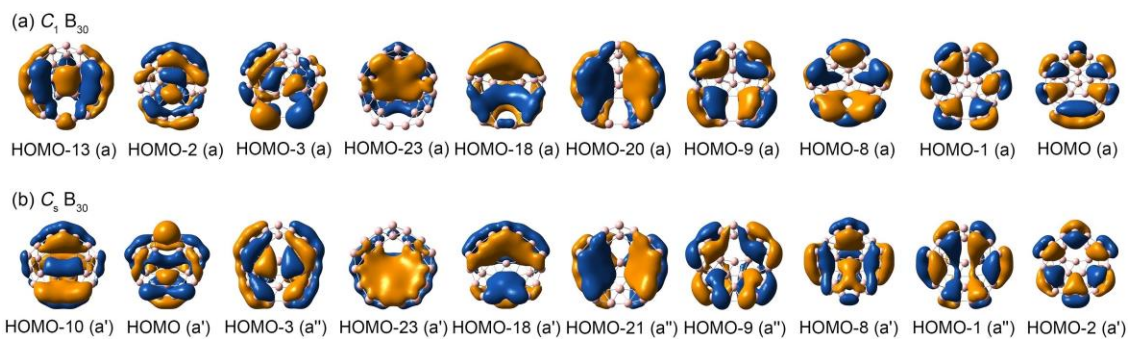

Supplement: c6cp04464f1.pdf [file c6cp04464f1.pdf]
